# Supplementary material for: MET exon 14 skipping mutation is a hepatocyte growth factor (HGF)‐dependent oncogenic driver in vitro and in humanised HGF knock‐in mice
Source: PubMed Central journal article supplement (PMC10620121; doi:10.1002/1878-0261.13397), 2023-07-14

# Supplemental Figure S2

(A)

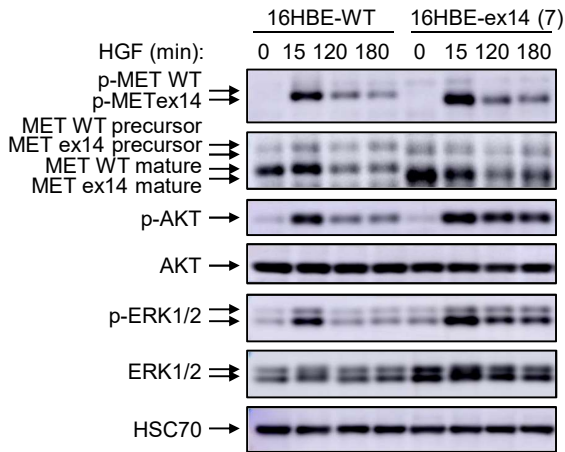

(B)

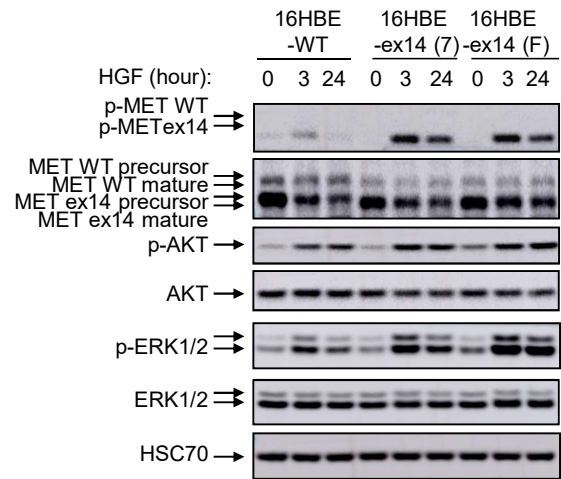

(C)

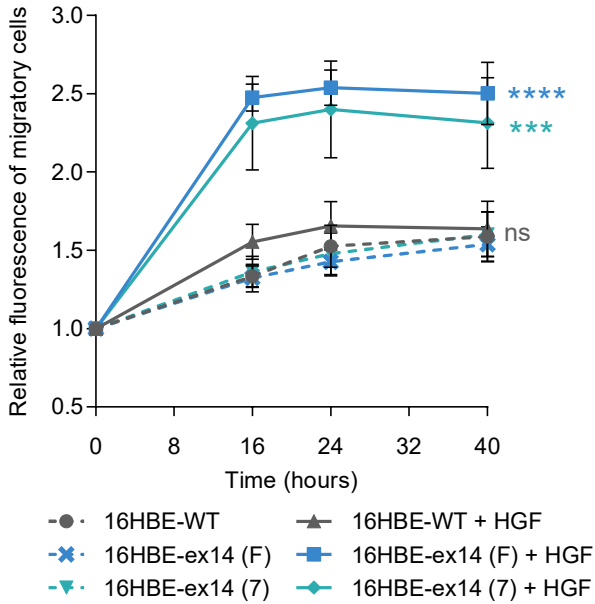

(D)

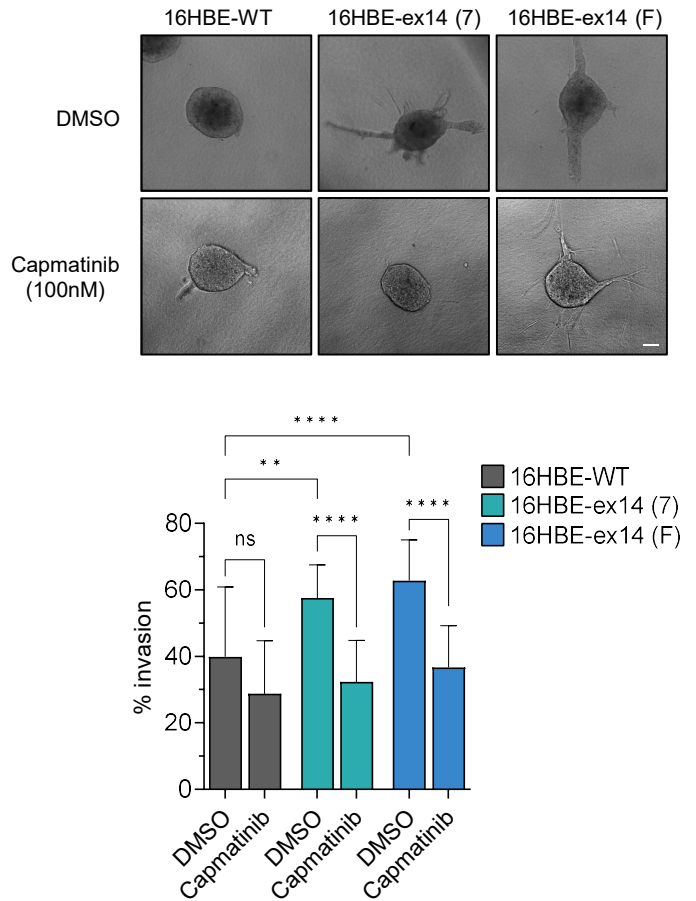

Supplement: MOL2-17-2257-s001.pdf [file MOL2-17-2257-s001.pdf]
