# Supplementary material for: MET exon 14 skipping mutation is a hepatocyte growth factor (HGF)‐dependent oncogenic driver in vitro and in humanised HGF knock‐in mice
Source: PubMed Central journal article supplement (PMC10620121; doi:10.1002/1878-0261.13397), 2023-07-14

# Supplemental Figure S4

**(A)**

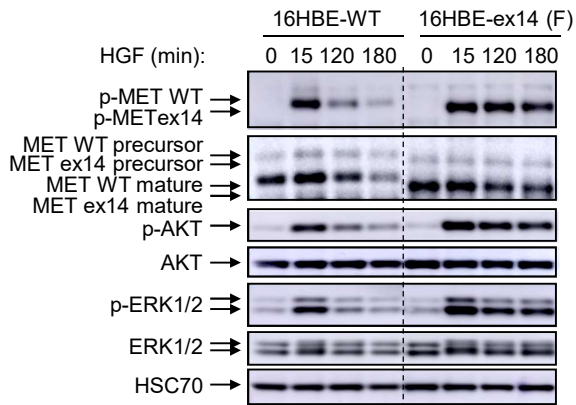

**(B)**

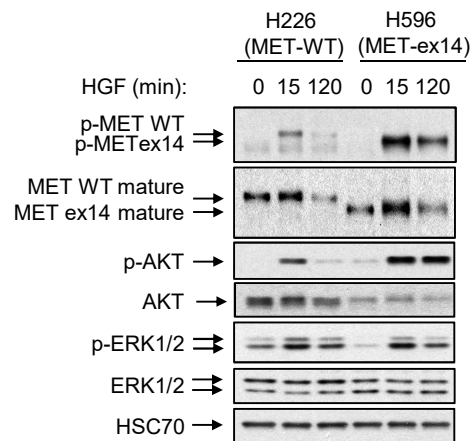

**(C)**

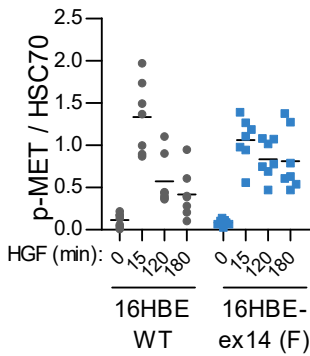

**(D)**

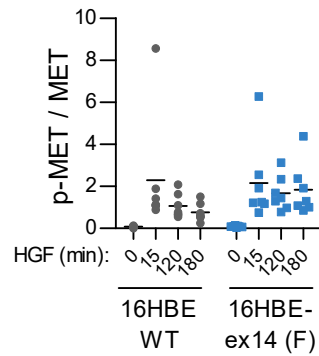

**(E)**

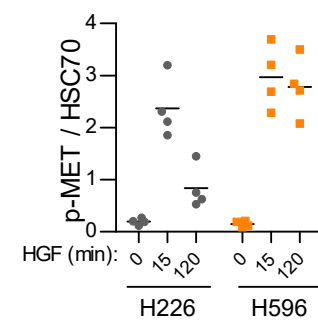

**(F)**

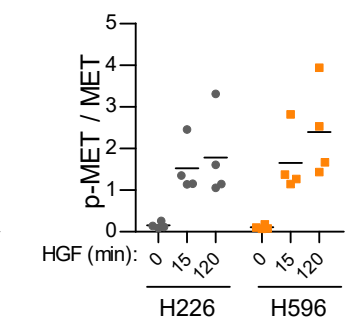

**(G)**

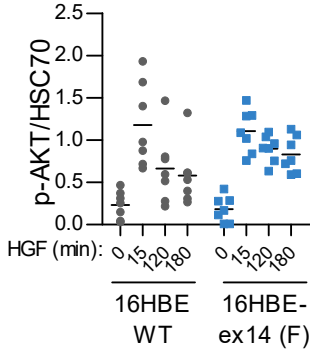

**(H)**

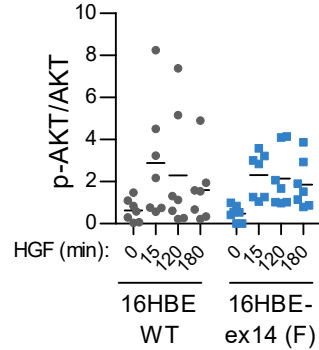

**(I)**

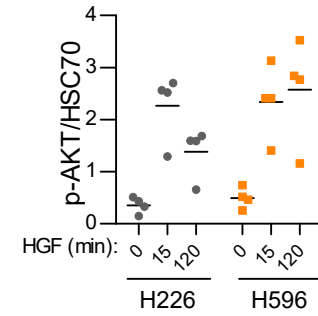

**(J)**

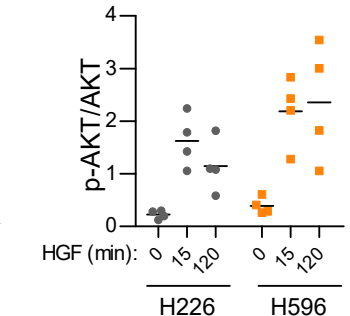

**(K)**

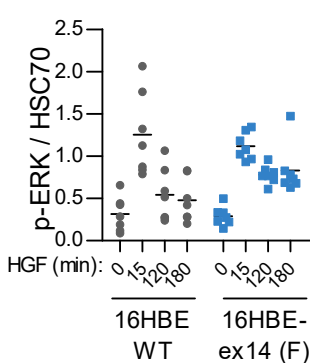

**(L)**

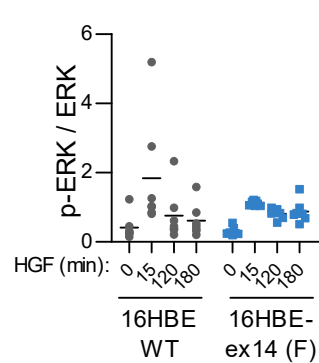

**(M)**

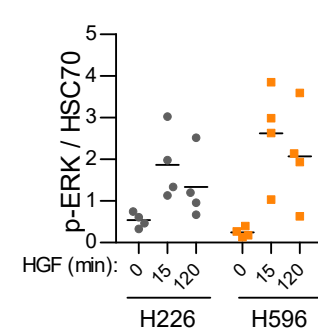

**(N)**

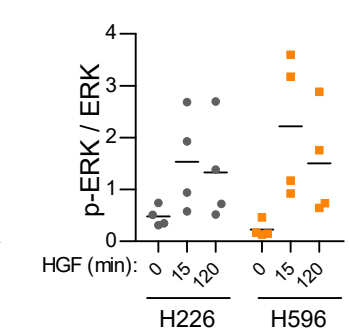

Supplement: MOL2-17-2257-s003.pdf [file MOL2-17-2257-s003.pdf]
