# Supplementary material for: MET exon 14 skipping mutation is a hepatocyte growth factor (HGF)‐dependent oncogenic driver in vitro and in humanised HGF knock‐in mice
Source: PubMed Central journal article supplement (PMC10620121; doi:10.1002/1878-0261.13397), 2023-07-14
Supplement: MOL2-17-2257-s005.pdf [file MOL2-17-2257-s005.pdf]

**Supplemental Table 1**

| Patient number | MET exon 14 mutation | Histologic subtype | IHC MET | MET amplif. | Ratio/ mean of copy number | Other molecular alterations                | IHC HGF |
|----------------|----------------------|--------------------|---------|-------------|----------------------------|--------------------------------------------|---------|
| CHUL #2        | c.3076_3082+2del     | ADC                | 3+      | No          | 1.2/3.1                    |                                            | 60      |
| CHUL #7        | c.3082+2T>C          | ADC                | 2+      | No          | 0.36/1.67                  |                                            | 60      |
| CHUL #15       | c.2942-31_2942-4del  | ADC                | 2+      | No          | 1.04/2.91                  |                                            | 120     |
| CHUL #31       | c.2942-36_2942-4del  | ADC                | 2+      | No          | 0.4/1.82                   |                                            | 70      |
| CHUL #33       | c.3082G>T            | ADC                | 2+      | No          | 0.62/3.97                  | TP53 c.809T>C                              | 90      |
| CHUL #63       | c.3082+2T>C          | ADC                | ND      | ND          |                            |                                            | 60      |
| CHUL #66       | c.2942-1G>C          | ADC                | ND      | ND          |                            | PIK3CA c.1636C>A (Q546K)                   | 60      |
| CHUL #68       | c.3080A>G            | ADC                | 3+      | ND          |                            | KRAS c.35G>A (G12D)                        | 50      |
| CHUL #45       | 3077_3082+1del       | ADC                | 3+      | Yes         | clusters in 67% of cells   | PIK3CA c.1262C>T; TP53 c.396G>C            | 0       |
| CHUL #57       | c.3082+1G>A          | ADC                | 2+      | ND          |                            | GNAS c.601C>T; MDM2 and CDK4 amplification | 0       |
| CHUL #60       | c.3082+3A>T          | ADC                | 3+      | ND          |                            |                                            | 0       |
| CHUL #61       | c.2942-21_2942-3del  | ADC                | 2+      | ND          |                            |                                            | 0       |
| CHUL #9        | c.2942-14_2942-4del  | ADC                | 1+      | No          | 0.99/1.84                  | PTEN loss                                  | NI      |
| CHUL #14       | c.2942-47_2949del    | ADC                | 1+      | No          | 0.95/1.5                   | PTEN loss                                  | NI      |
| CHUL #37       | c.2942-19_2942-4del  | ADC                | ND      | ND          |                            | TP53 c.610G>T                              | NI      |
| CHUL #51       | c.2942-21_2945del    | ADC                | 2+      | ND          |                            |                                            | NI      |
| CHUL #69       | c.2942-21_2942-8del  | ADC                | ND      | ND          |                            |                                            | NI      |
| CHUL #70       | c.3082G>C            | ADC                | 3+      | ND          |                            |                                            | NI      |
